# Supplementary material for: Transport behaviors of photo-carriers across the aligned carbon nanotubes and silicon interface
Source: Royal Society of Chemistry journal article supplement (doi:10.1039/c4nr03433c), 2014-01-01
Supplement: c4nr03433c1.pdf [file c4nr03433c1.pdf]

Supporting information for

## Transport Behaviors of Photo-Carriers across Aligned Carbon Nanotubes and Silicon Interface

Ru Li,<sup>a,b</sup> Hongfang Li,<sup>b</sup> Jingyun Zou,<sup>b</sup> Xiaohua Zhang,<sup>b</sup> and Qingwen Li<sup>b,\*</sup>

<sup>a</sup>University of Chinese Academy of Science, Yuquan Road 19, Beijing, 100049, China..

<sup>b</sup> Suzhou Institute of Nano-Tech and Nano-Bionics, Ruoshui Road 398, Suzhou, 215123, China.

Email: qwli2007@sinano.ac.cn

1. The photograph of CNT sheet directly drawn from the spinnable CNT array.

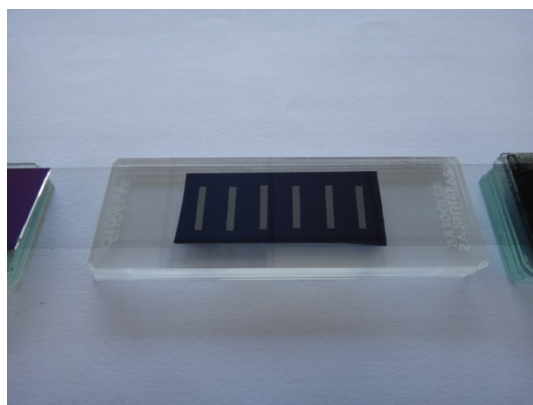

Figure S1: The photograph of CNT sheet drawn from spinnable CNT array and the patterned SiO<sub>2</sub>/Si substrate.

2. SEM images of aligned CNTs on SiO<sub>2</sub>/Si substrate and the conductivity in the parallel and vertical direction.

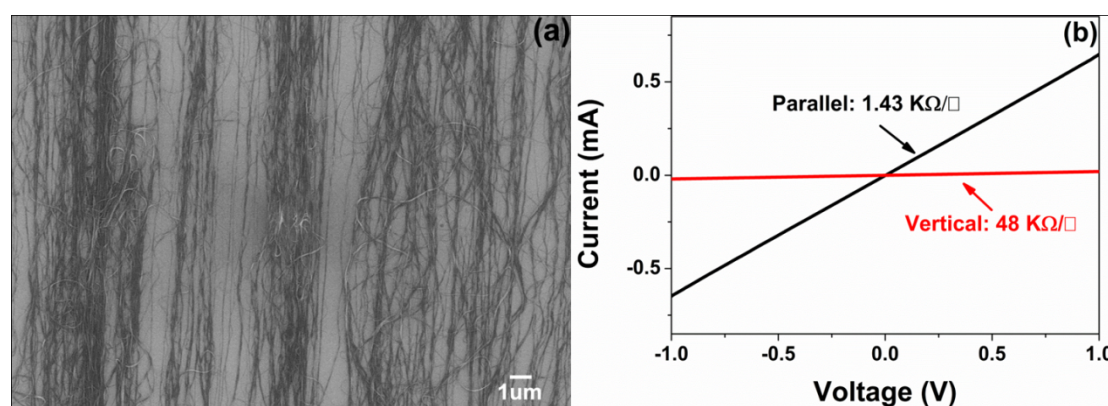

Figure S2: (a) Typical SEM image of aligned CNTs on a SiO<sub>2</sub>/Si substrate. (b) The conductivity of the CNT film in the parallel and vertical direction.

3. TG and TEM of the double-walled carbon nanotube.

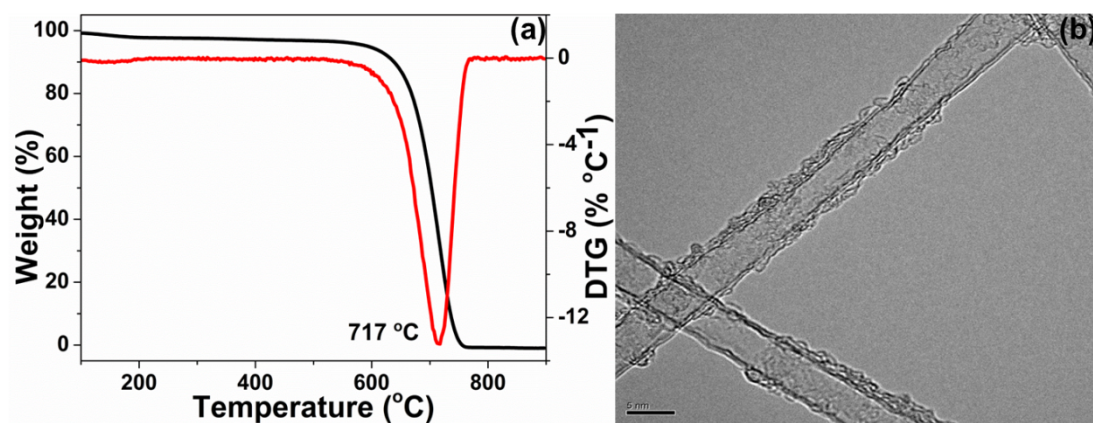

Figure S3: TG (a) analysis of TEM image (b) of the double-walled CNTs in the CNT array.
